# Supplementary material for: Carrageenan in meat: improvement in lipid metabolism due to Sirtuin1-mediated fatty acid oxidation and inhibited lipid bioavailability
Source: Royal Society of Chemistry journal article supplement (doi:10.1039/d3fo00906h), 2023-01-01
Supplement: d3fo00906h1.pdf [file d3fo00906h1.pdf]

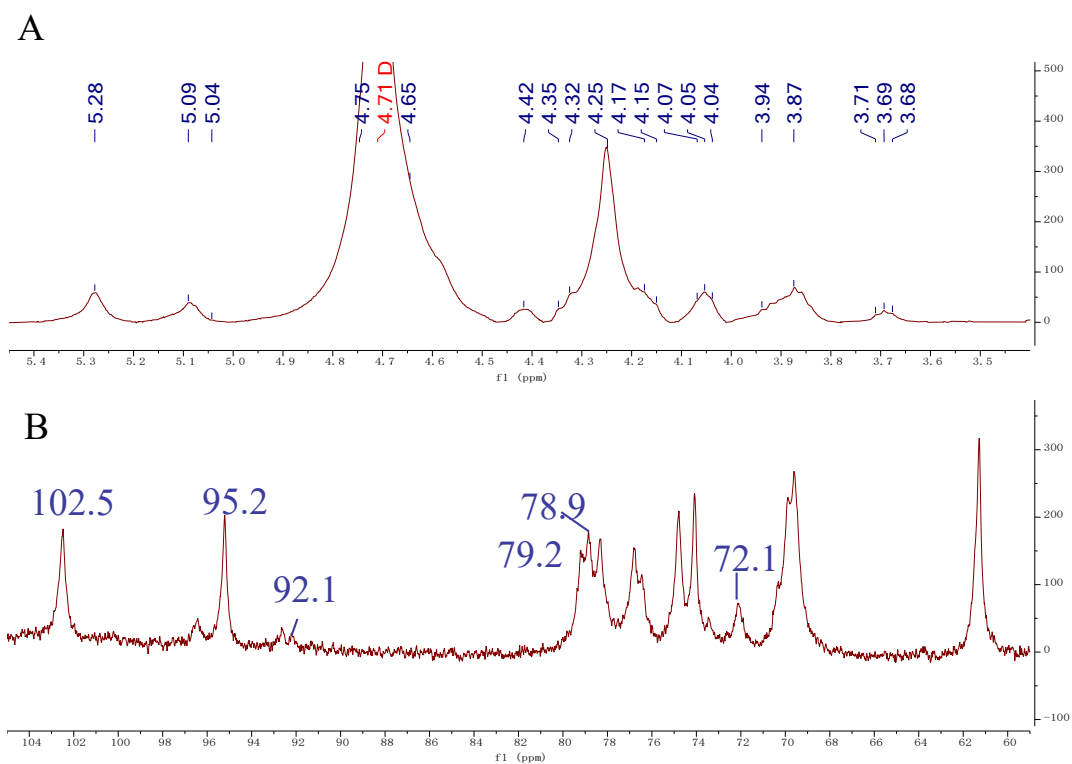

Fig. S1.  $\kappa$ -type was the main type in the CGN sample. (A).  $^1\text{H}$  NMR spectrum. (B).  $^{13}\text{C}$  NMR spectrum.

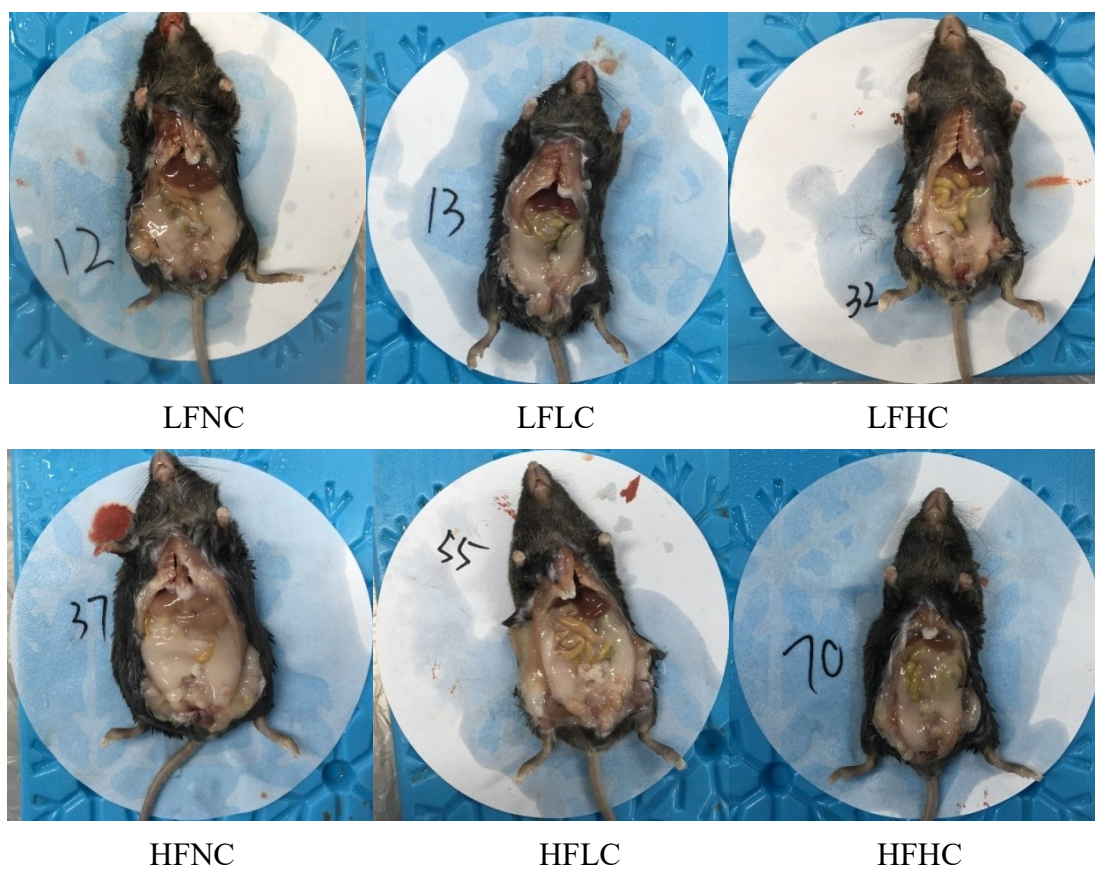

Fig. S2. Intraperitoneal morphology at the end of the dietary intervention.

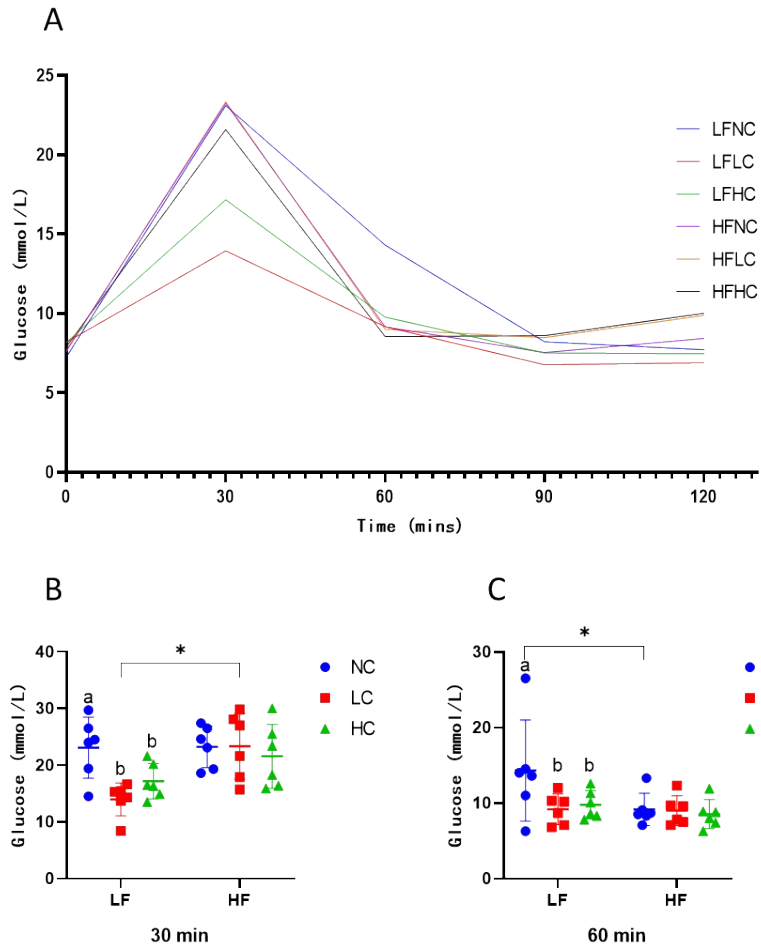

Fig. S3. Oral glucose tolerance test (OGTT). (A) the changes of blood glucose levels from 0 min to 120 min, (B) the blood glucose levels at 30 min, (C) the blood glucose levels at 60 min.

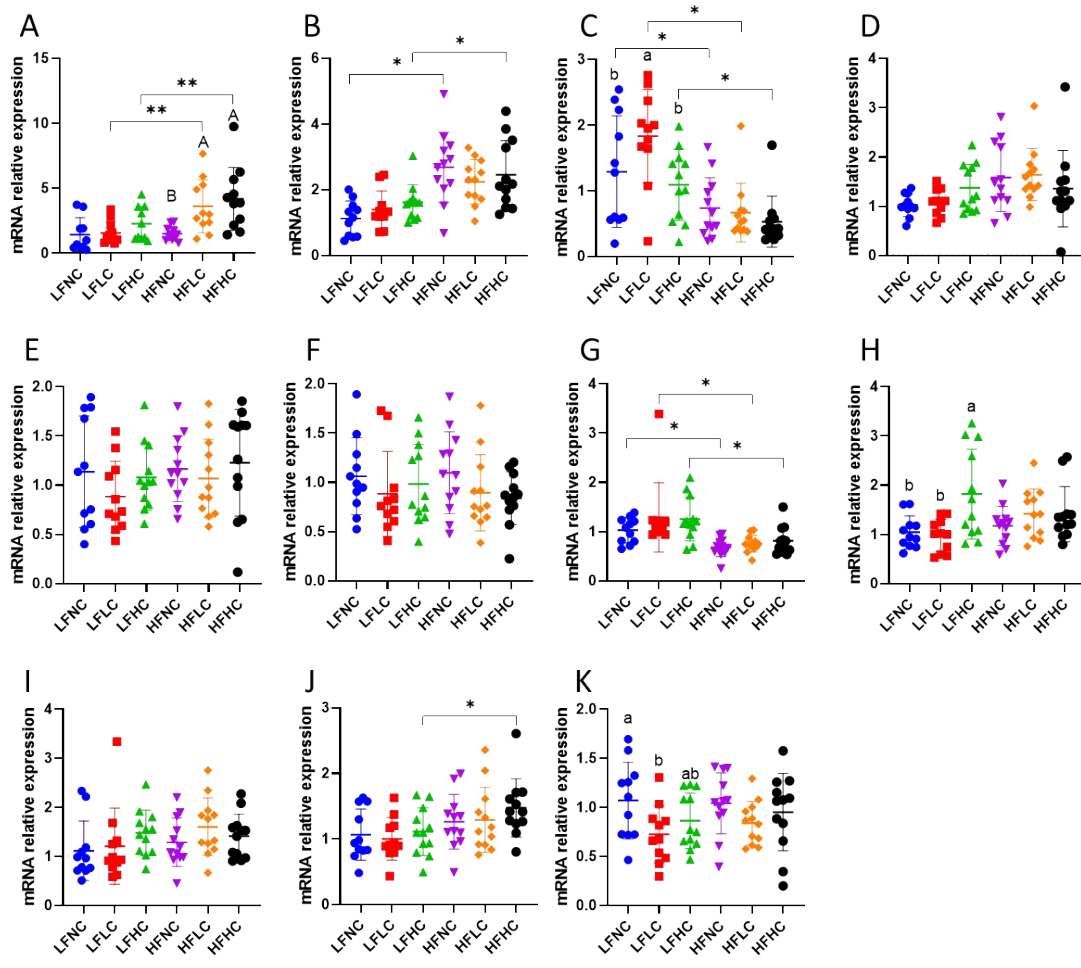

Fig. S4. mRNA levels of *Cyp7a1* (A), *Pparg* (B), *Ppard* (C), *Mlxipl* (D), *Gpam* (E), *Srebf1* (F), *Creb1* (G), *Prkaal* (H), *Ppargc1a* (I), *Ppargc1b* (J), and *G6pc* (K) in liver.

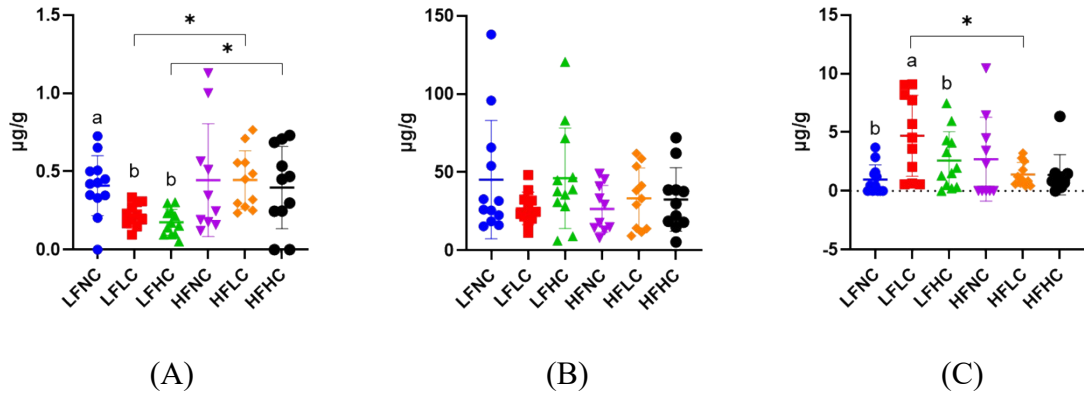

Fig. S5. Concentration of NorDCA (A), 12-ketoLCA (B) and UCA (C) in colonic contents.

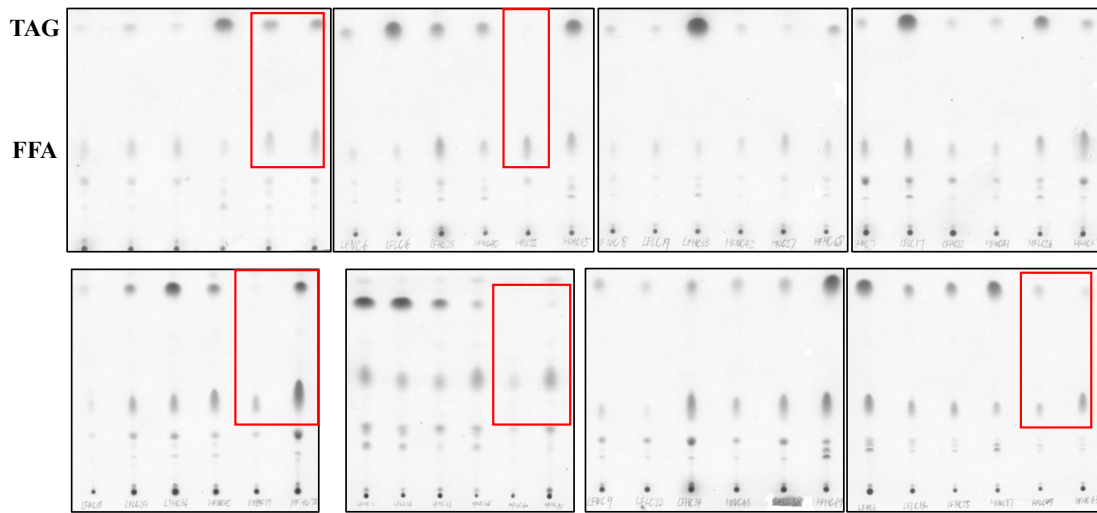

Fig. S6. The blots of lipid extracted from ileal contents on the silica G gel plates.

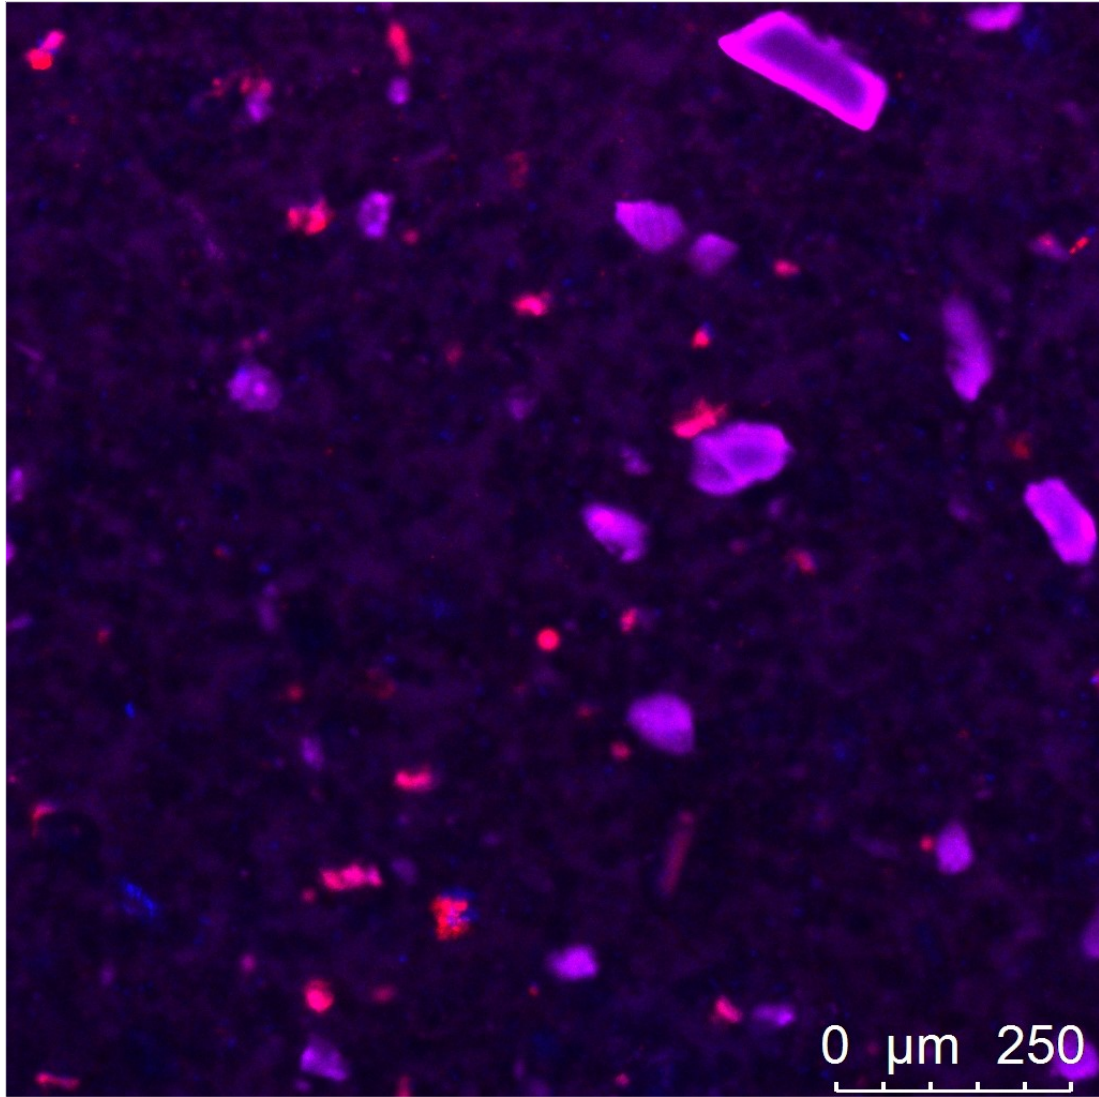

Fig. S7. *In vitro* digesta of HFNC diet (mixture, merged).

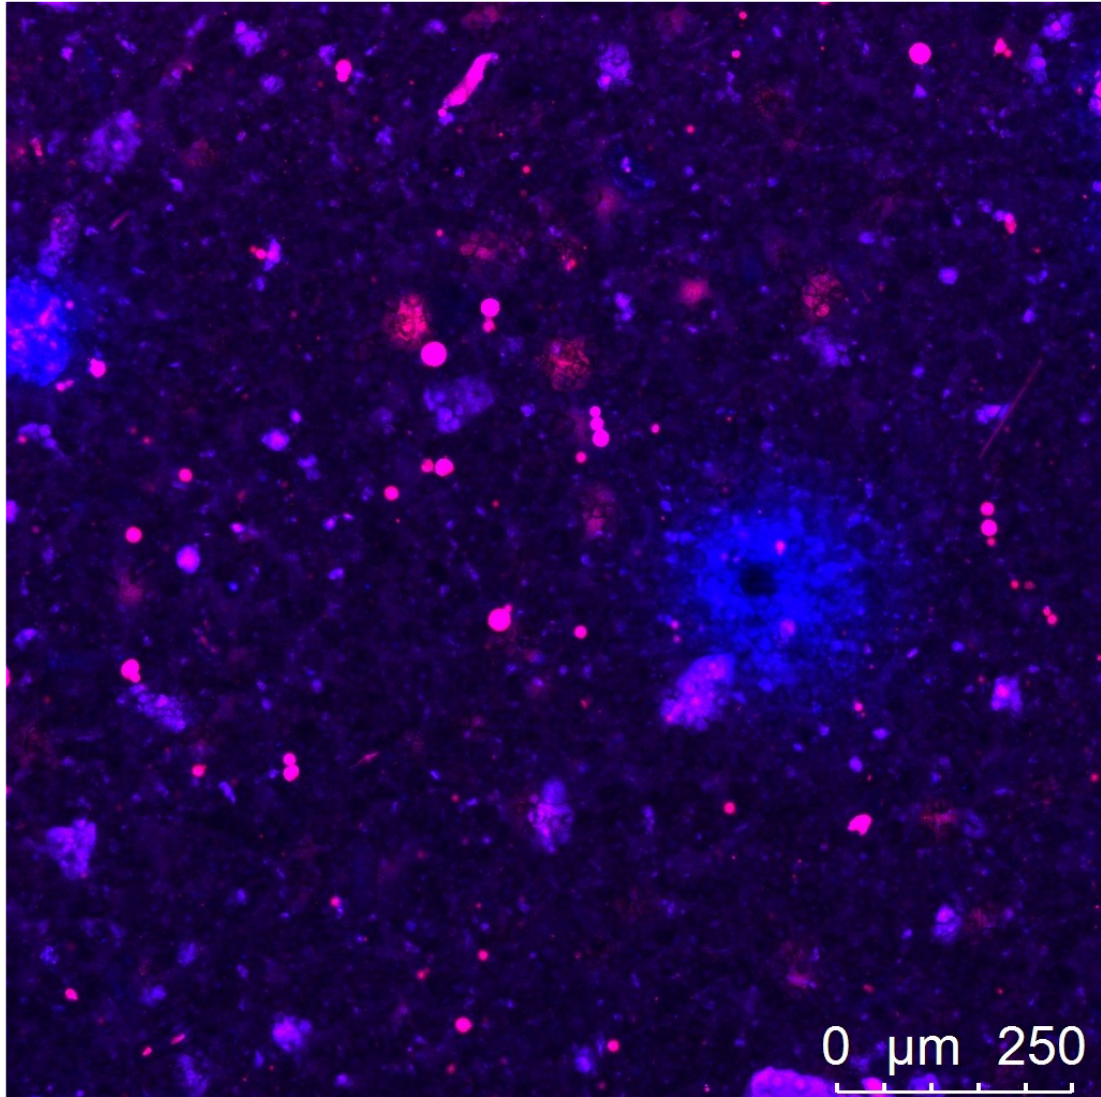

Fig. S8. *In vitro* digesta of HFLC diet (mixture, merged)

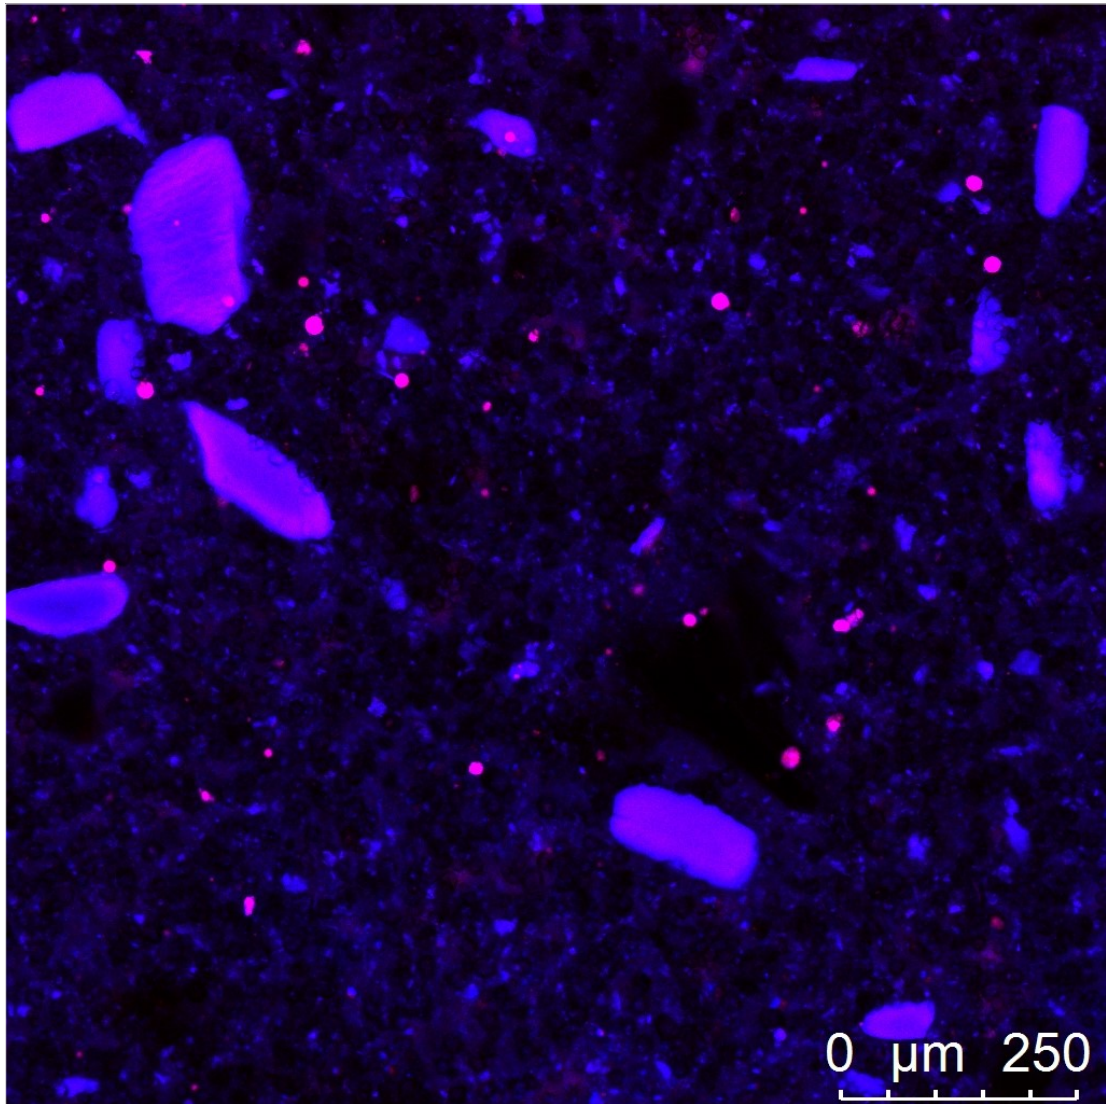

Fig. S9. *In vitro* digesta of HFHC diet (mixture, merged)

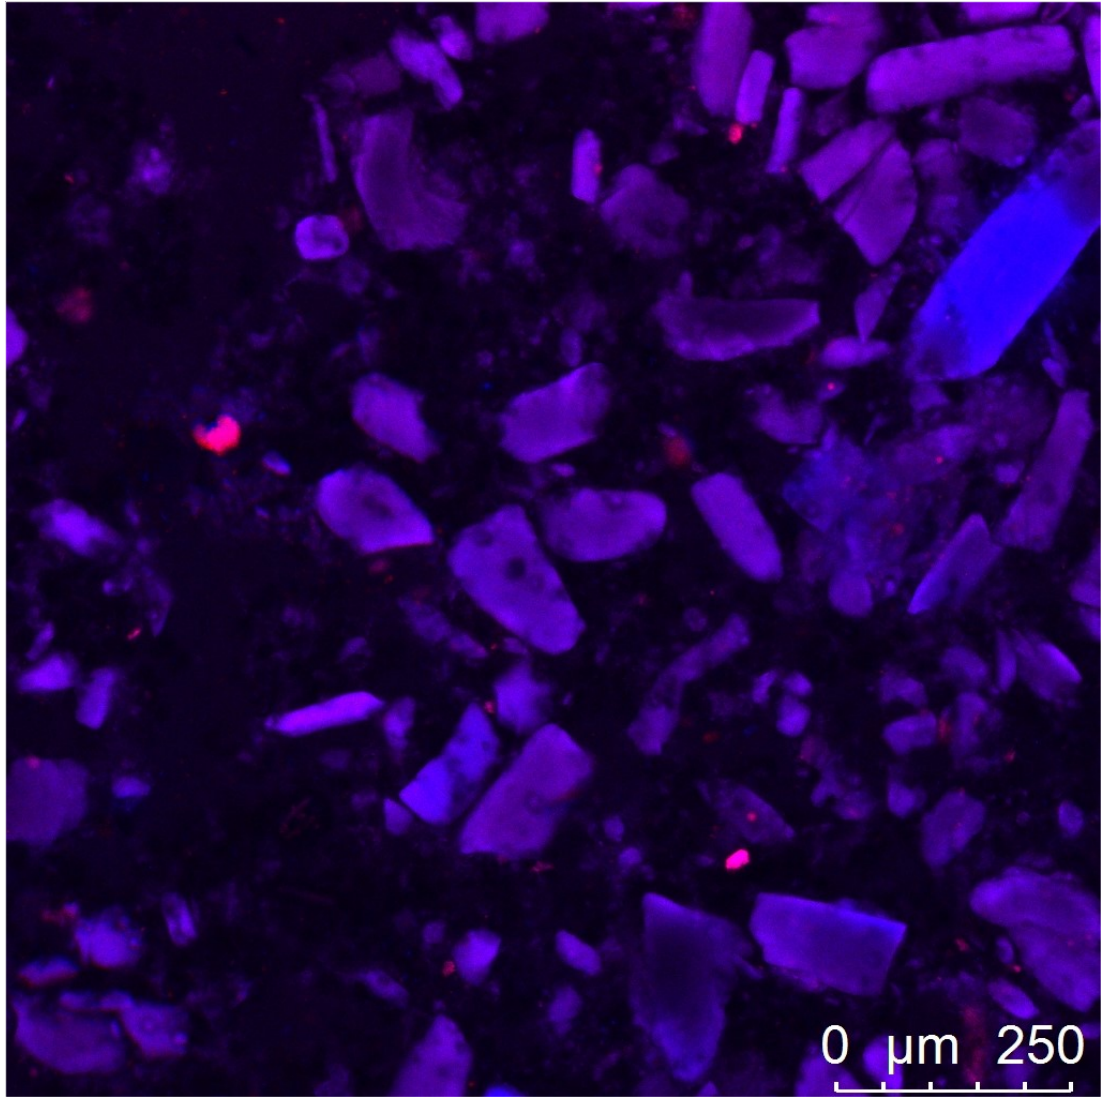

Fig. S10. *In vitro* digesta of HFNC diet (precipitate, merged)



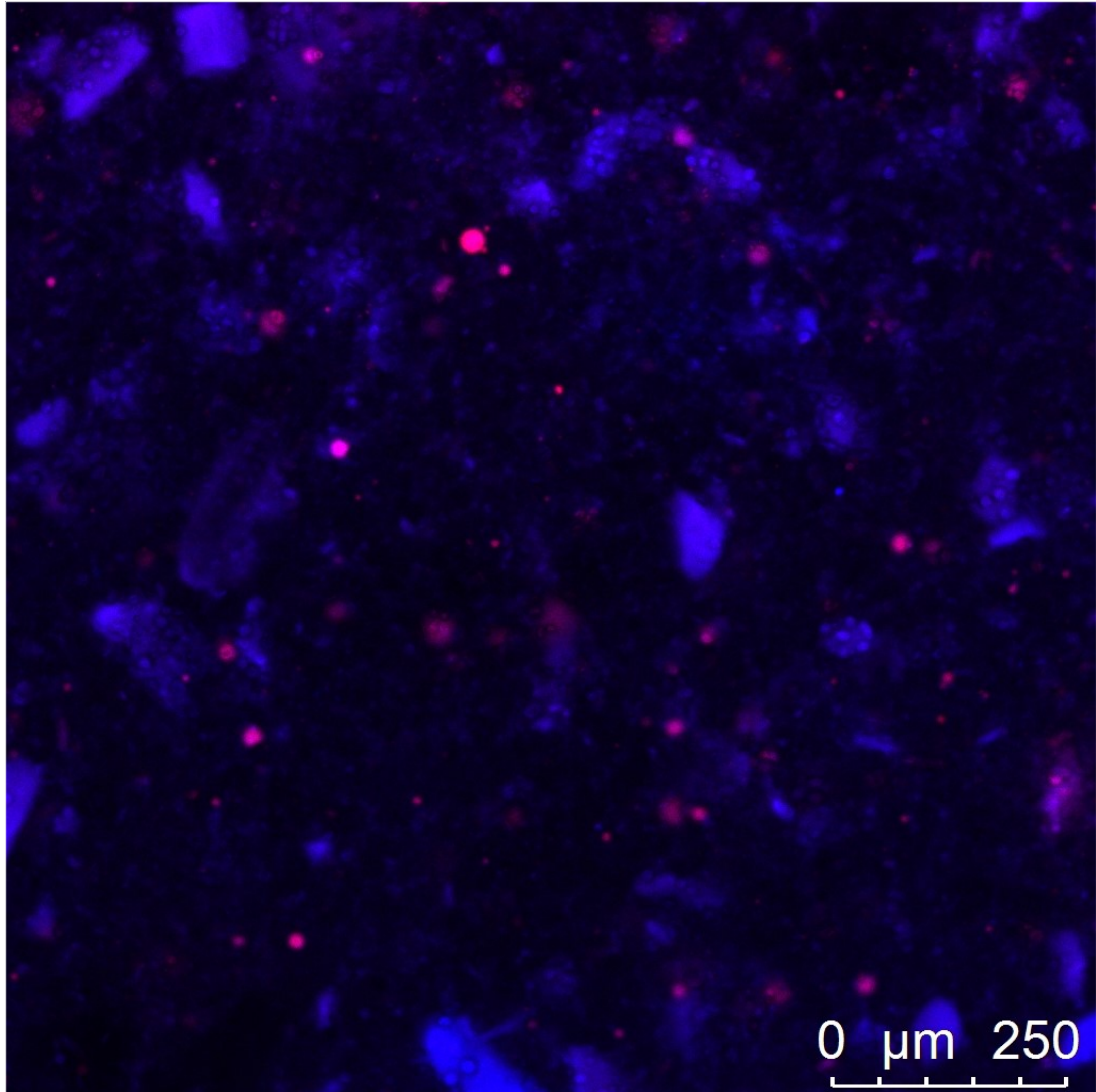

Fig. S11. *In vitro* digesta of HFLC diet (precipitate, merged)

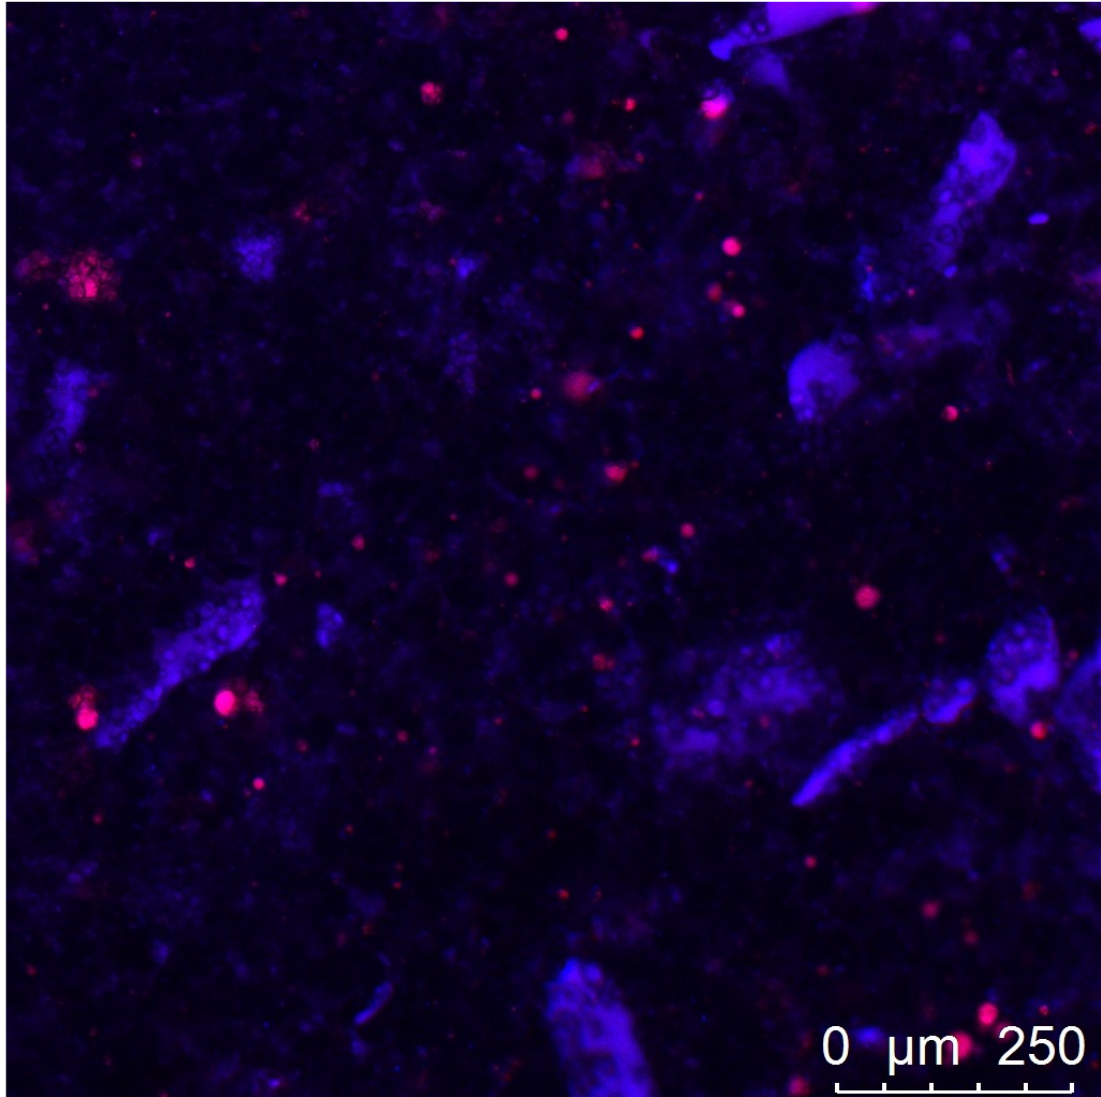

Fig. S12. *In vitro* digesta of HFHC diet (precipitate, merged)

**Table S1. Formula and Caloric Information of Diets**

| Diet Formula (g)             | Low-fat diet groups |        |        | High-fat diet groups |        |        |
|------------------------------|---------------------|--------|--------|----------------------|--------|--------|
|                              | LFNC                | LFLC   | LFHC   | HFNC                 | HFLC   | HFHC   |
| Pork protein                 | 186.22              | 186.22 | 186.22 | 186.22               | 186.22 | 186.22 |
| L-cysteine(protein)          | 2.79                | 2.79   | 2.79   | 2.79                 | 2.79   | 2.79   |
| Corn starch                  | 471.32              | 471.32 | 471.32 | 291.99               | 291.99 | 291.99 |
| Maltodextrin                 | 116.39              | 116.39 | 116.39 | 116.39               | 116.39 | 116.39 |
| Sucrose                      | 67.78               | 67.78  | 67.78  | 67.78                | 67.78  | 67.78  |
| Cellulose                    | 46.55               | 27.93  | 9.31   | 46.55                | 27.93  | 9.31   |
| $\kappa$ -Carrageenan        | 0.00                | 18.62  | 37.24  | 0.00                 | 18.62  | 37.24  |
| Soybean oil                  | 23.28               | 23.28  | 23.28  | 23.28                | 23.28  | 23.28  |
| Lard                         | 18.62               | 18.62  | 18.62  | 197.92               | 197.92 | 197.92 |
| Mineral mix                  | 55.87               | 55.87  | 55.87  | 55.87                | 55.87  | 55.87  |
| Choline bitartrate           | 2.79                | 2.79   | 2.79   | 2.79                 | 2.79   | 2.79   |
| Vitamin mix                  | 8.38                | 8.38   | 8.38   | 8.38                 | 8.38   | 8.38   |
| TBHQ                         | 0.01                | 0.01   | 0.01   | 0.04                 | 0.04   | 0.04   |
| Total                        | 1000                | 1000   | 1000   | 1000                 | 1000   | 1000   |
| Caloric Information (% kcal) |                     |        |        |                      |        |        |
| Protein                      | 19.1                | 19.1   | 19.1   | 14.88                | 14.88  | 14.88  |
| Carbohydrate                 | 69.97               | 69.97  | 69.97  | 40.12                | 40.12  | 40.12  |
| Fat                          | 10.94               | 10.94  | 10.94  | 45                   | 45     | 45     |
| Energy density (kcal/Kg)     | 3.76                | 3.76   | 3.76   | 4.65                 | 4.65   | 4.65   |

**Table S2. Primer Sequences for RT-qPCR**

| Genes           | Official full names                                            | Primers                                                  |
|-----------------|----------------------------------------------------------------|----------------------------------------------------------|
| <i>Acadl</i>    | acyl-CoA dehydrogenase long chain                              | F: GTCATGGCTATGGCACCGA<br>R: GCTTCAGCCTCCACTCAGATA       |
| <i>Acaca</i>    | acetyl-Coenzyme A carboxylase alpha                            | F: TTGTTTGGTCGTGACTGCTCT<br>R: TGTGTTCAAATACTGCTGGGGT    |
| <i>Cpt1a</i>    | carnitine palmitoyl transferase 1A                             | F: CCATCCAACACGTCAAGGACA<br>R: TCCCGTCATGGTAGAGCCAG      |
| <i>Elovl6</i>   | ELOVL family member 6, elongation<br>of long chain fatty acids | F: TCAGATGCTGATGGGCTGTG<br>R: GCCGATGTAGGCCTCAAAGA       |
| <i>Ppara</i>    | peroxisome proliferators-activated<br>receptor alpha           | F: GAACGACCAAGTCACCTTGC<br>R: ACTCGCGTGTGATAAAGCCA       |
| <i>Fasn</i>     | fatty acid synthase                                            | F: CCCATCAAGAAGTGCTGGGAT<br>R: TATCCCTGGAGCATGGGGTC      |
| <i>Mlxipl</i>   | MLX interacting protein-like                                   | F: GAGCGATGGTGCGAACAGC<br>R: GGTGAAGAGTGTGTCGGAGAT       |
| <i>Creb1</i>    | cAMP responsive element binding<br>protein 1                   | F: CAAACATAACCAGATCCGCACA<br>R: TAGACGGACCTCTCTTTCCG     |
| <i>Mgat1</i>    | monoacylglycerol O-acyltransferase 1                           | F: ACGGGCTTGTATTCGTCCAG<br>R: GTACGACAGGTCCAACCTGGG      |
| <i>Gpam</i>     | glycerol-3-phosphate acyltransferase,<br>mitochondrial         | F: ATCATAACGAGATGCCACCGG<br>R: AGTTGAACTCCTCCGACAGC      |
| <i>Gapdh</i>    | glyceraldehyde-3-phosphate<br>dehydrogenase                    | F: CGTGCCGCCTGGAGAAACCTG<br>R: AGAGTGGGAGTTGCTGTTGAAGTCG |
| <i>G6pc</i>     | glucose-6-phosphatase, catalytic                               | F: GTTTGGTTTCGCGCTTGGAT<br>R: GCCGCTCACACCATCTCTTA       |
| <i>Srebf1</i>   | sterol regulatory element binding<br>transcription factor 1    | F: AAGACCGGTAGCGCTTCTCA<br>R: CCATCTTGGCCACAGTACCT       |
| <i>Ppargc1a</i> | peroxisome proliferative activated                             | F: GACCCTCCTCACACCAAACC                                  |

|                 |                                                                           |                                                      |
|-----------------|---------------------------------------------------------------------------|------------------------------------------------------|
|                 | receptor, gamma, coactivator 1 alpha                                      | R: GACCCTCCTCACACCAAACC                              |
| <i>Ppargc1b</i> | peroxisome proliferative activated<br>receptor, gamma, coactivator 1 beta | F: GTATCCAGGCACATCGAGGG<br>R: AAGATGGACAGCTCCGTGTG   |
| <i>Sirt1</i>    | Sirtuin1                                                                  | F: GAGGTGTTGGTGGCAACTCT<br>R: AGGCTAGGTGGTGAATATGCC  |
| <i>Sirt3</i>    | Sirtuin3                                                                  | F: TCTCAAGCCCGTCGATGTTC<br>R: CAGGCCCAATGTCACTCACT   |
| <i>Sirt6</i>    | Sirtuin6                                                                  | F: CGAAACATGCACTGCACCAT<br>R: GACCCTGCGTGCTAGACAAA   |
| <i>Pparg</i>    | peroxisome proliferators-activated<br>receptor gamma                      | F: TTCGATCCGTAGAAGCCGTG<br>R: TCCTTGGCCCTCTGAGATGA   |
| <i>Ppard</i>    | peroxisome proliferators-activated<br>receptor delta                      | F: CACAGTGGAGACAGTCCGAG<br>R: CGCCATACTTGAGGAGGGTC   |
| <i>Cebpb</i>    | CCAAT/enhancer binding protein<br>beta                                    | F: GACAAGCTGAGCGACGAGTA<br>R: GCTTGAACAAGTTCCGCAGG   |
| <i>Dgat2</i>    | diacylglycerol O-acyltransferase 2                                        | F: CATCCGGAAGTTACCAGCCA<br>R: GCCTGGGTGCCTTCTGTAAC   |
| <i>Xbp1</i>     | X-box binding protein 1                                                   | F: AGAGGTCTACCCAGAAGGACC<br>R: TTAATGGCTTCCAGCTTGGCT |
| <i>Prkaal</i>   | protein kinase, AMP-activated, alpha<br>1 catalytic subunit               | F: CTACCTAGCAACCAGCCCAC<br>R: TTCGGCAACCAAGAACGGTA   |
| <i>Cyp7a1</i>   | cytochrome P450, family 7, subfamily<br>a, polypeptide 1                  | F: CAGCCTTTCCCGGGCTTTAT<br>R: GCCTTCTGCTACCGAGTGAT   |
| <i>mt-Nd1</i>   | NADH dehydrogenase 1,<br>mitochondrial                                    | F: TCCGAGCATCTTATCCACGC<br>R: GTATGGTGGTACTCCCGCTG   |

---

**Table S3. Targeted Bile Acids Information**

| Names                                  | Abbreviations  | CAS        |
|----------------------------------------|----------------|------------|
| Allolithocholic acid                   | alloLCA        | 2276-93-9  |
| Lithocholic acid                       | LCA            | 434-13-9   |
| Isolithocholic acid                    | isoLCA         | 1534-35-6  |
| 23-Nordeoxycholic acid                 | NorDCA         | 53608-86-9 |
| 6-ketolithocholic acid acetate         | 6-ketoLCA      | NA         |
| 12-ketolithocholic acid                | 12-ketoLCA     | 5130-29-0  |
| 7-ketolithocholic acid                 | 7-ketoLCA      | 4651-67-6  |
| 3 $\beta$ -Ursodeoxycholic acid        | $\beta$ -UDCA  | 78919-26-3 |
| Deoxycholic acid                       | DCA            | 83-44-3    |
| Chenodeoxycholic acid                  | CDCA           | 474-25-9   |
| Ursodeoxycholic acid                   | UDCA           | 128-13-2   |
| Hyodeoxycholic acid                    | HDCA           | 83-49-8    |
| Norcholic acid                         | NorCA          | 60692-62-0 |
| Dehydrocholic acid                     | DHCA           | 81-23-2    |
| 7,12-diketolithocholic acid            | 7,12-diketoLCA | 517-33-9   |
| 6,7-diketolithocholic acid             | 6,7-diketoLCA  | NA         |
| $\alpha$ -Muricholic acid              | $\alpha$ -MCA  | 2393-58-0  |
| Ursocholic acid                        | UCA            | 2955-27-3  |
| $\beta$ -Muricholic acid               | $\beta$ -MCA   | 2393-59-1  |
| Cholic acid                            | CA             | 81-25-4    |
| Allocholic acid                        | ACA            | 2464-18-8  |
| 3 $\beta$ -Cholic acid                 | $\beta$ CA     | 3338-16-7  |
| Glycolithocholic acid Sodium Salt      | GLCA           | 24404-83-9 |
| Glycohyodeoxycholic acid               | GHDCA          | 13042-33-6 |
| Glycochenodeoxycholic acid Sodium Salt | GCDCA          | 16564-43-5 |
| Glycoursodeoxycholic acid              | GUDCA          | 64480-66-6 |
| Glycodeoxycholic acid Sodium Salt      | GDCA           | 16409-34-0 |

|                                                 |                  |             |
|-------------------------------------------------|------------------|-------------|
| Lithocholic acid 3-sulfate Sodium Salt          | LCA-3S           | 34669-57-3  |
| Sodium Glycocholate Hydrate                     | GCA              | 863-57-0    |
| Tauroolithocholic acid Sodium Salt              | TLCA             | 6042-32-6   |
| Taurohyodeoxycholic acid Sodium Salt            | THDCA            | 38411-85-7  |
| Taoursodeoxycholic acid Sodium Salt             | TUDCA            | 35807-85-3  |
| Taurodeoxycholic acid Sodium Salt               | TDCA             | 1180-95-6   |
| Taurochenodeoxycholic acid                      | TCDCa            | 6009-98-9   |
| Taurocholic acid Sodium Salt                    | TCA              | 145-42-6    |
| Tauro- $\alpha$ -muricholic acid Sodium Salt    | T- $\alpha$ -MCA | 25696-60-0  |
| Taurohyocholic acid Sodium Salt                 | THCA             | NA          |
| Tauro- $\beta$ -muricholic acid Sodium Salt     | T- $\beta$ -MCA  | 145022-92-0 |
| Chenodeoxycholic acid glucuronic acid conjugate | CDCA-G           | NA          |

**Table S4. Information on  $\kappa$ -CGN molecular weight**

| Molar mass ( $\times 10^5$ g/mol) |                   |                   |                   | Polydispersity    |                   | RMS radius (nm) |                 |                 |
|-----------------------------------|-------------------|-------------------|-------------------|-------------------|-------------------|-----------------|-----------------|-----------------|
| $M_n$                             | $M_p$             | $M_w$             | $M_z$             | $M_w/M_n$         | $M_z/M_n$         | $r_n$           | $r_w$           | $r_z$           |
| 4.359                             | 5.694             | 5.703             | 7.349             | 1.308             | 1.686             | 79.0            | 85.8            | 94.9            |
| ( $\pm 2.048\%$ )                 | ( $\pm 1.197\%$ ) | ( $\pm 1.290\%$ ) | ( $\pm 3.203\%$ ) | ( $\pm 2.420\%$ ) | ( $\pm 3.802\%$ ) | ( $\pm 1.4\%$ ) | ( $\pm 0.8\%$ ) | ( $\pm 0.7\%$ ) |
